# Supplementary material for: G-quadruplexes mark alternative lengthening of telomeres
Source: PubMed Central journal article supplement — NAR Cancer. 2021 Jul 21;3(3):zcab031. doi: 10.1093/narcan/zcab031 (PMC8294677; doi:10.1093/narcan/zcab031), 2021-07-21
Supplement: zcab031_supplemental_file.pdf [file zcab031_supplemental_file.pdf]

# G-quadruplexes mark Alternative-Lengthening-of-Telomeres

Sunny Y. Yang<sup>1</sup>, Emily Y.C. Chang<sup>2</sup>, Joanne Lim<sup>1</sup>, Harwood Kwan<sup>1</sup>, David Monchaud<sup>3</sup>, Stephen Yip<sup>4</sup>, Peter C. Stirling<sup>2</sup> and Judy M.Y. Wong<sup>1,\*</sup>

<sup>1</sup> Faculty of Pharmaceutical Sciences, University of British Columbia, Vancouver, Canada

<sup>2</sup> Terry Fox Laboratory, BC Cancer, Vancouver, Canada

<sup>3</sup> Institut de Chimie Moléculaire, ICMUB CNRS UMR 6302, UBFC Dijon, France

<sup>4</sup> Department of Pathology and Laboratory Medicine, University of British Columbia, Vancouver, Canada

\* To whom correspondence should be addressed. Tel: 604-827-3314 ; Fax: 604-822-3035 ; Email: [judy.wong@ubc.ca](mailto:judy.wong@ubc.ca)

## EXTENDED METHODS

### Production and purification of BG4

BL21-DE3 bacteria was transformed using the plasmid pSANG10-3F-BG4 (Addgene #55756) using standard quick transformation (1) in TSS buffer (1X Luria Broth (LB), 10% polyethylene glycol 8000, 5% DMSO, 50mM Mg<sup>2+</sup>, pH 6.5, sterile-filtered). Colonies were checked using restriction enzyme digestion by NcoI/HindIII (0.9 and 5.2 kb bands). Selected clone was grown in 500mL LB in 2L flasks until OD<sub>600</sub> 0.5-0.6 was reached. Then, Isopropyl-β-D-thiogalactopyranoside (IPTG) (Calbiochem, 420322) was added to culture to the final concentration of 0.5 mM. The flask was incubated overnight at 17°C while shaking at 120 rpm. Cells were collected and sonicated using the Branson Sonifier. Ni-NTA agarose beads (Qiagen, #30210) was used for affinity chromatography for capturing His-tagged BG4 antibody. Western blotting and ICC were used to check for FLAG-tag integrity. ICC in cells treated with G4 ligands was performed to test for ligand-induced changes in BG4 signals.

### Telomere length measurements

Genomic DNA was harvested using QIAamp DNA kit (Qiagen cat #56304). Telomere restriction fragment (TRF) by Southern Blotting was performed as described previously (2). Southern blot images were collected using a storage phosphor screen and Typhoon Scanner (GE Healthcare) and quantified using ImageQuant. For Tel-qPCR, PCR reaction was set up using tel1b primer (5'-CGGTTTGGTTGGGTTTGGGTTTGGGTTTGGGTTTGGGTT-3') with final concentration of 100nM and

tel2b primer (5'-GGCTTGCCTTACCCTTACCCTTACCCTTACCCTTACCCT-3') with final concentration of 500 nM. Alu repeat was used as genome background control. Alu DNA was quantified using Alu forward primer (5'-GACCATCCCGGCTAAAACG-3') and reverse primer (5'-CGGGTTCACGCCATTCTC-3') at a final concentration of 100nM. The ratio of qPCR signal of Tel to Alu was used as relative telomere length score.

### **Sequential ChIP (ChIP-ReChIP)**

1st ChIP was performed as previously mentioned. After the 1st ChIP washing step, the beads were resuspended in 1% SDS/10 mM DTT/1X PIC/TE and incubated for 30 min at 37°C. The tube was spun down and the supernatant was transferred to a new tube and diluted 20 times in 1X IP buffer (0.1% SDS, 1 mM EDTA, 10 mM Tris, pH 8, 1% Triton-X, 150 mM NaCl). BSA was added to 0.1% final concentration. A small aliquot was saved from the 1st ChIP eluate for input. 5 µL of 2nd ChIP antibody was added to each tube and incubated overnight at 4°C on the rotator. The next day, 20 µL of 50% slurry of the appropriate pre-blocked agarose beads was added and incubated for 2h on rotator at 4°C. Beads were wash 3 times in ReChIP Wash Buffer (0.1% SDS, 1% NP40, 2mM EDTA, 500mM NaCl) and one time in TE buffer for 5 min each. Beads were incubated in 1% SDS/15mM DTT/TE at 65°C overnight for elution. Extraction was performed the next day as described above. Normalization of the signal was performed against beads only control for each corresponding sample.

### **Transfection for ICC and ChIP**

Cells were transfected using JetPrime transfection reagent (Polyplus). Cells were seeded 20000-60000 cells per coverslips in a 24-well plate and incubated for 24h at 37°C. The next day, the cells were transfected with 250 ng of vector DNA using a ratio according to the manufacturer's recommended protocol. Cells were then incubated for 6h at 37°C. Then, the media were replaced with fresh media and incubate for another 24h. Cells were then harvested for ICC or ChIP, as mentioned above.

### **Transfection for PLA**

For experiments with in vitro RNaseH1 treatment, RNaseH1 treatment was done after permeabilization for 2h at 37°C before blocking. For experiments with GFP or GFP-RNH1 overexpression, transfection

was done 24h post-seeding, and cells were fixed 24h post-transfection. For RNA interference, cells were transfected with siGENOME-SMARTpool siRNAs from Dharmacon (MQ-0219550-01-0005): Non-targeting siRNA Pool #1 as si-Control and si-FANCM. The set of 4 siRNA sequences has the following sequences: [GUACUGCACUUGAGAAUUU], [CAAACCAUGUUCACAAUUA], [CAACAGUGGUGAAUAGUAA], [GAACAAGAUUCCUCAUUAC]. Transfections were done with Lipofectamine RNAiMAX transfection reagent (Invitrogen) according to the manufacturer's protocol, and cells were fixed 48h after the siRNA administration.

### **ChIP for nuclease-treated samples**

ChIP was performed as described above with the following modifications. Two plates of cells were sonicated and pooled. The pooled sonicates were precleared then split into three fractions: one for mock control (same conditions without any nuclease addition) and the two others with nuclease of interest added. A small aliquot was saved as input control. DNase I (NEB) and RNase H (NEB) were used at 50U in 1X reaction buffer/ IP buffer. RNase A was used at 50 µg/mL. Samples were then incubated at 37°C for 1h. The proceeding steps followed those of the ChIP protocol described above.

**SUPPLEMENTARY FIGURES AND TABLES**

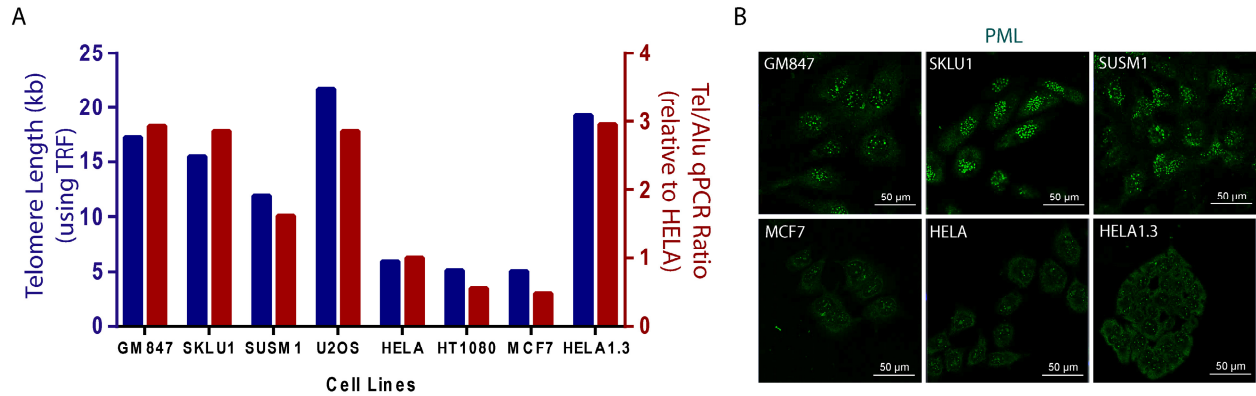

**Figure 1. Confirmation of ALT status in a panel of ALT+ and TERT+ cell lines. (A)** Mean telomere length as measured by TRF (blue) or Tel-qPCR (red) in ALT+ cell lines (GM847, SKLU1, SUSM1, U2OS) and TERT+ cell lines (HELA, HT1080, MCF7, HELA1.3) **(B)** ICC staining for PML in a panel of ALT+ (top) and TERT+ (bottom) cell lines.

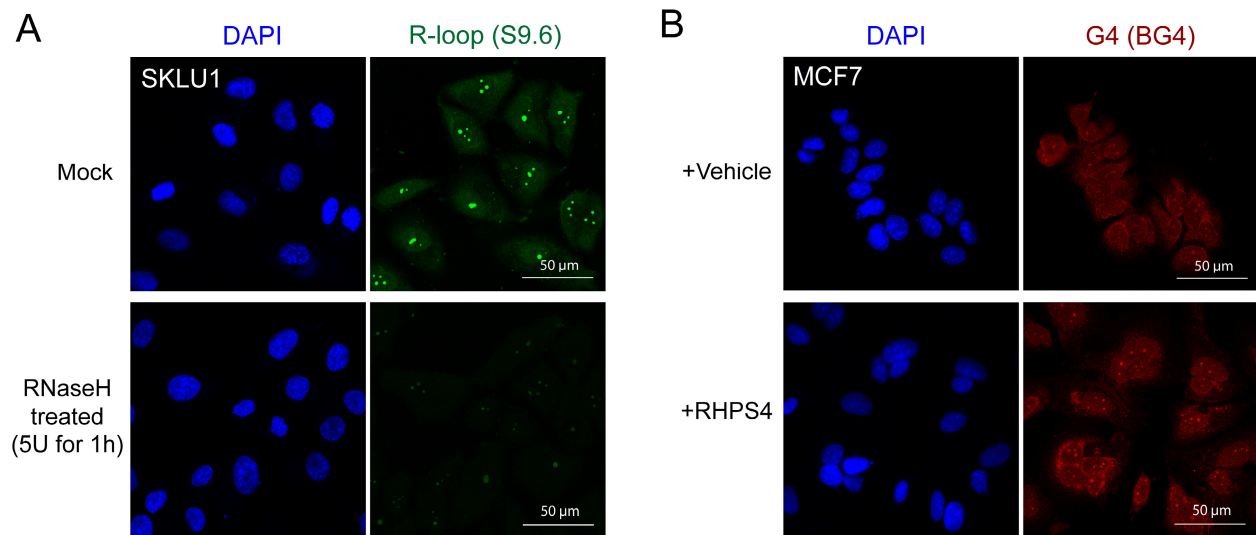

**Figure 2. Antibody specificity test. A)** R-loop antibody, S9.6, staining in SKLU1 undergoing either the mock condition or RNaseH digestion (5U) for 1h. **B)** G4 antibody, BG4, staining in either untreated or RHSP4-treated MCF7.

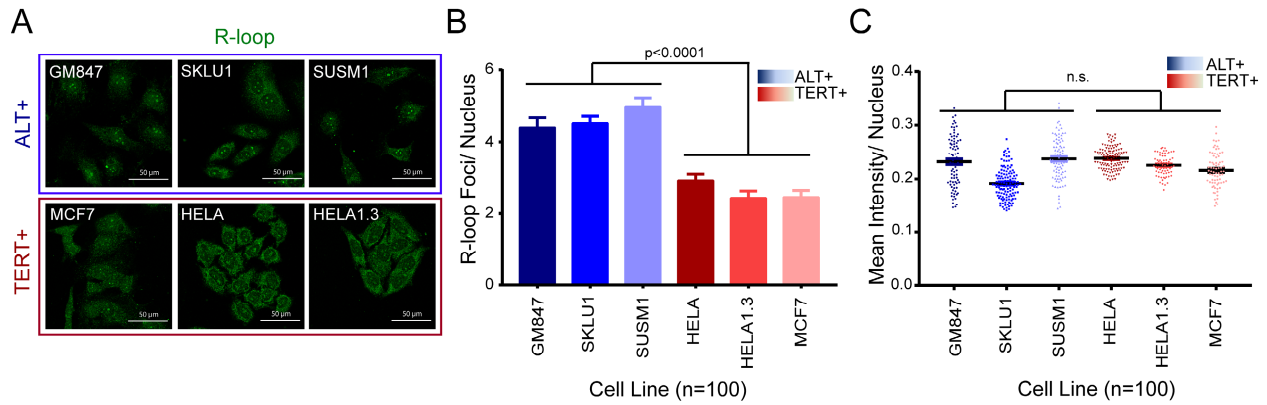

**Figure 3. ALT+ cells harbour higher level of telomeric R-loops than TERT+ cells.** (A) Immunocytochemistry (ICC) staining experiments for R-loop in ALT+ cells lines (within blue frame) versus TERT+ (within red frame). (B) Average number of R-loop foci per nucleus. Automated quantification of 100 cells per cell line was performed in parallel (C) Mean R-loop foci intensity per nucleus as quantified. Automated quantification of 100 cells per cell line was performed in parallel. Two-tailed t-tests were performed for comparing ALT+ versus TERT+ groups.

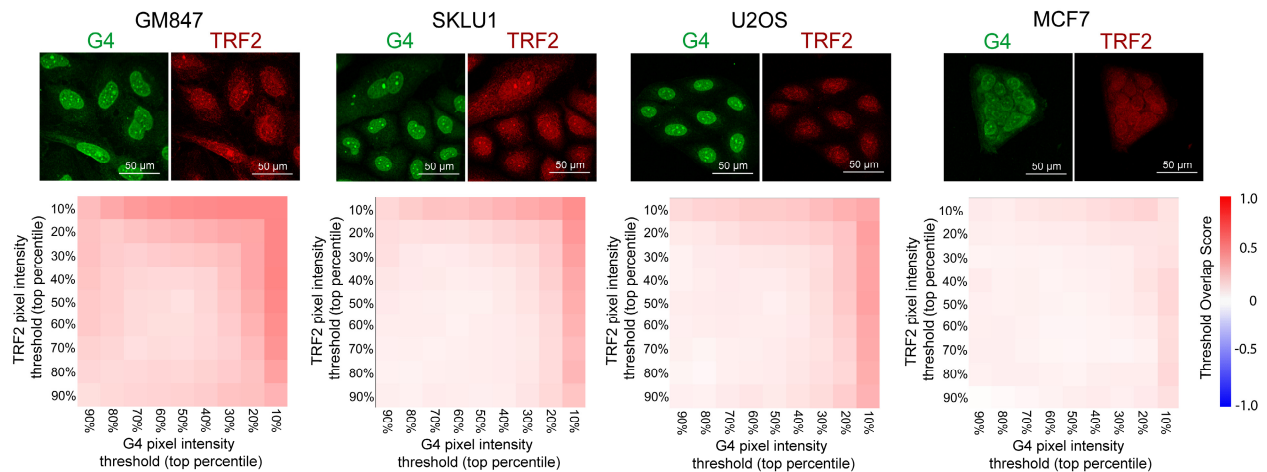

**Figure 4. ICC colocalization analysis of G4 and TRF2.** ICC co-staining for G4 (green) and TRF2 (red) for ALT+ cell lines (GM847, SKLU1, U2OS) and TERT+ cell line (MCF7). Below is the metric matrix of the threshold overlap score (TOS) for the top percentile of pixel (by intensity) of nuclear G4 signal (x-axis) and TRF2 signal (y-axis). Darker red colour corresponds with higher TOS.

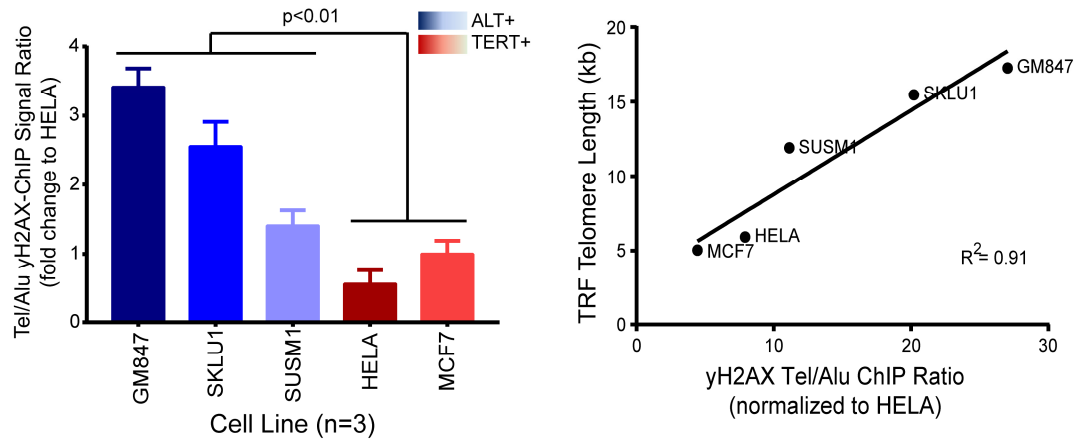

**Figure 5. Level of DNA damage signal,  $\gamma$ H2AX, is higher in ALT+ cells and are broadly associated with telomere length.**  $\gamma$ H2AX-ChIP assay in ALT+ cell lines (blue shades) versus TERT+ cell lines (red shades). Data shown are the mean from 3 biological repeat experiments. T-test (two-tailed) was performed for the combined ALT+ versus TERT+ datasets. Bottom; linear regression plot of Tel/Alu ChIP signal ratio against telomere length (as measured by telomere restriction fragment (TRF) analysis). Line of best fit is plotted along with  $R^2$  value.

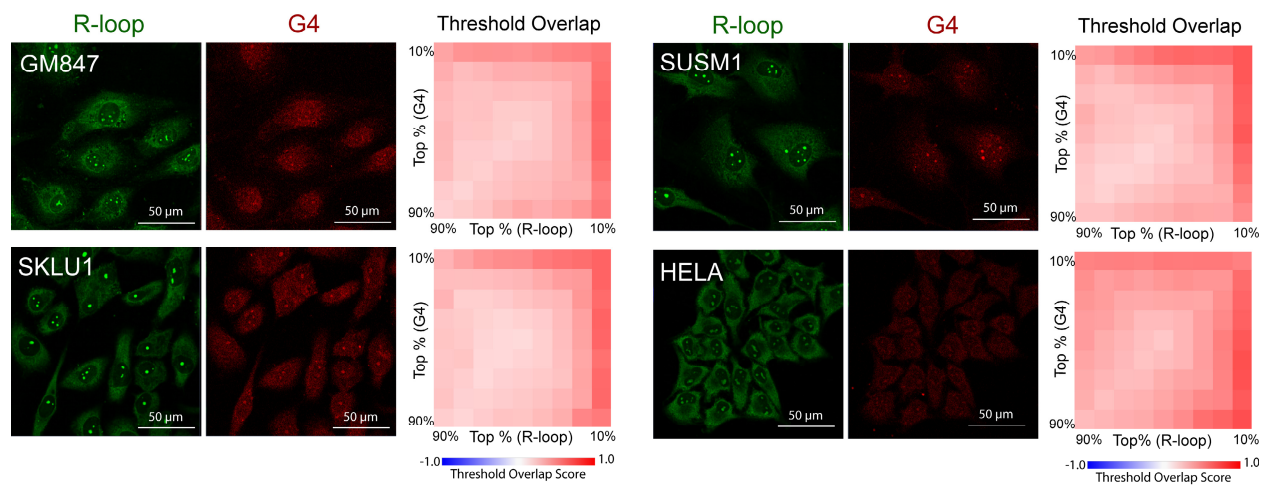

**Figure 6. ICC colocalization analysis of R-loop and G4.** ICC co-staining for R-loop (green) and G4 (red) in ALT+ (GM847, SKLU, SUSM1) and TERT+ (HELA). Right is the corresponding metric matrix of the threshold overlap score (TOS) for the top percentile of pixel (by intensity) of nuclear R-loop signal (x-axis) and G4 signal (y-axis).

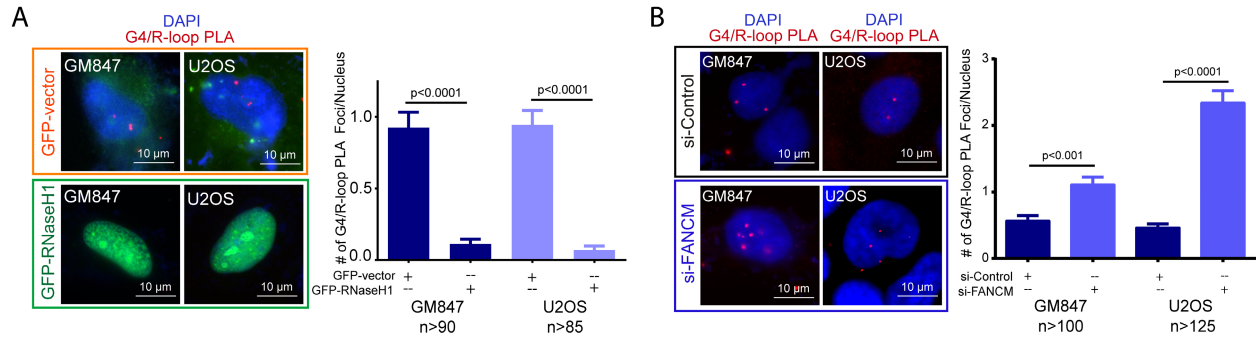

**Figure 7. PLA analysis in ALT+ cells with overexpressed RNaseH1 or FANCM-knockdown.** (A) Top; Proximity ligation assay (PLA) for G4 and R-loop (red foci) in GM847 and U2OS transfected with either GFP-vector (within orange frame) or GFP-RNaseH1 (within green frame). Bottom; Quantification for mean PLA foci count per nucleus. (B) Left; Proximity ligation assay for G4 and R-loop (red foci) in GM847 and U2OS transfected with either si-Control (within orange frame) or si-FANCM (within green frame). Right; Quantification for mean PLA foci count per nucleus. Two-way ANOVA with Sidak multiple comparisons was performed. Error bars represent the SEM.

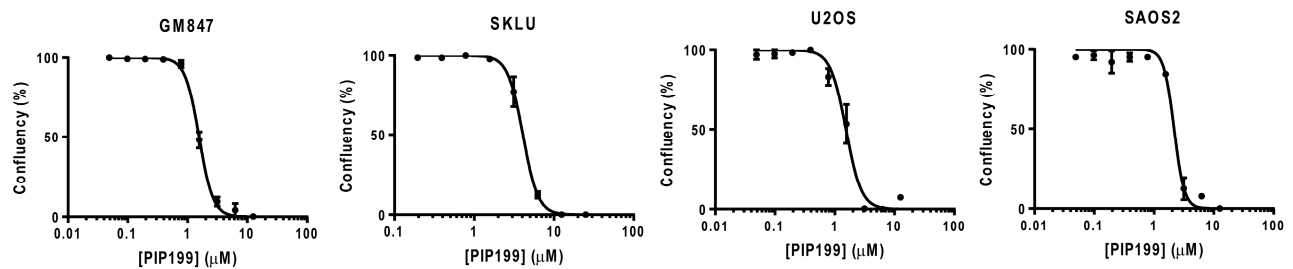

**Figure 8. Cytotoxicity profiles of PIP-199 in ALT cell lines.** Dose response curves after treatment with PIP-199 for 72h was generated for GM847, SKLU1, U2OS, and SAOS-2 cell lines. Curves were generated by 3 biological replicates. Error bars represent the SEM.

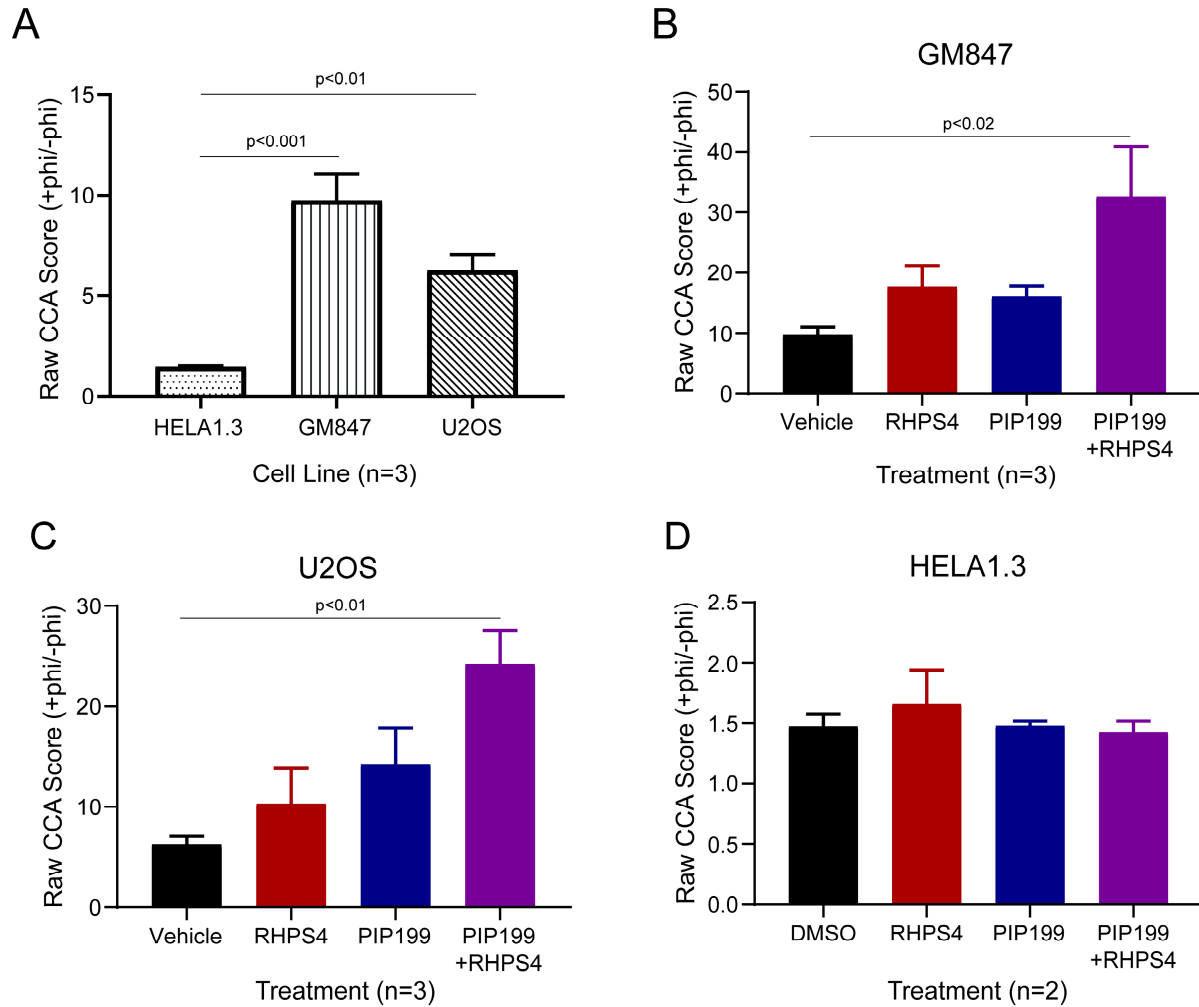

**Figure 9. Raw C-circle Assay (CCA) score.** A) Baseline CCA score in TERT+ (HELA 1.3) and ALT+ (GM847 and U2OS) cells B) GM847; C) U2OS; or D) HELA1.3 treated with either vehicle, RHPS4, PIP-199 or RHPS4+PIP-199. Raw CCA scores were derived from the ratio of Tel DNA in sample with phi polymerase (+phi) to sample without phi polymerase (-phi). One-way ANOVAs with Dunnett's multiple test correction were performed. Error bars represent the SEM.



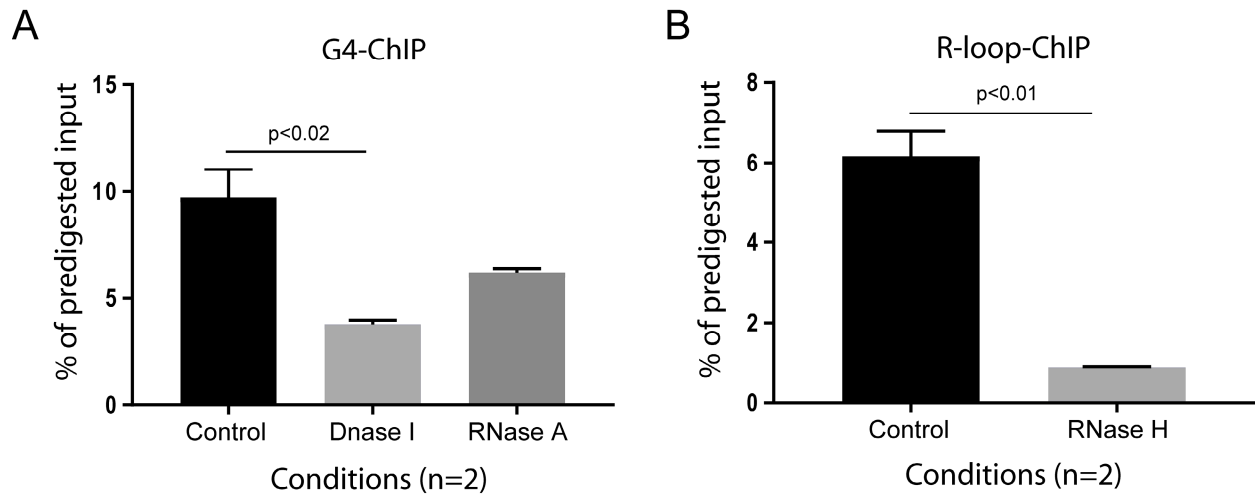

**Figure 10. ChIP in nuclease-treated samples.** A) G4-ChIP in mock control (with same condition), DNase I-treated sample and RNase A-treated sample harvested from GM847. One-way ANOVA with Dunnett's multiple test correction was performed. B) R-loop-ChIP in mock control (with same condition) and RNase H-treated sample harvest from GM847. Two-tailed t-test was performed. Telomeric DNA was quantified using qPCR. Error bars represent the SEM.

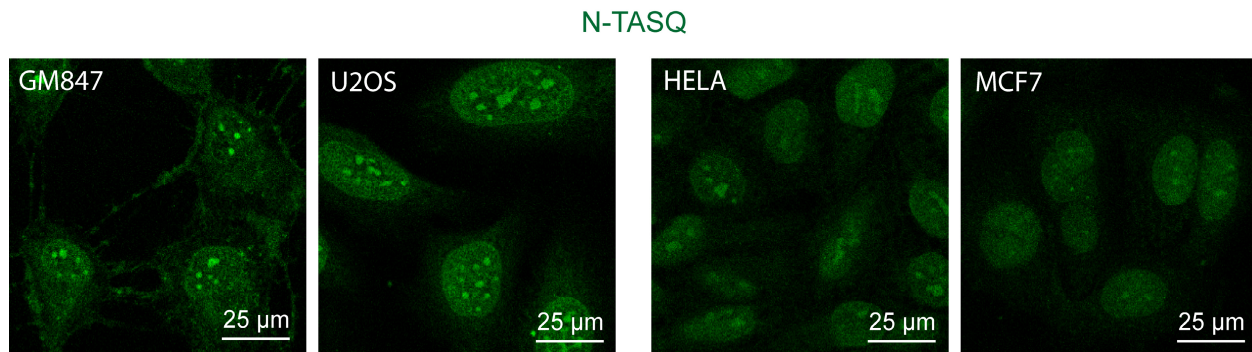

**Figure 11. N-TASQ staining images in ALT+ cells (GM847 and U2OS) and TERT+ cells (HELA and MCF7)**

TERT+ (ATRX+)

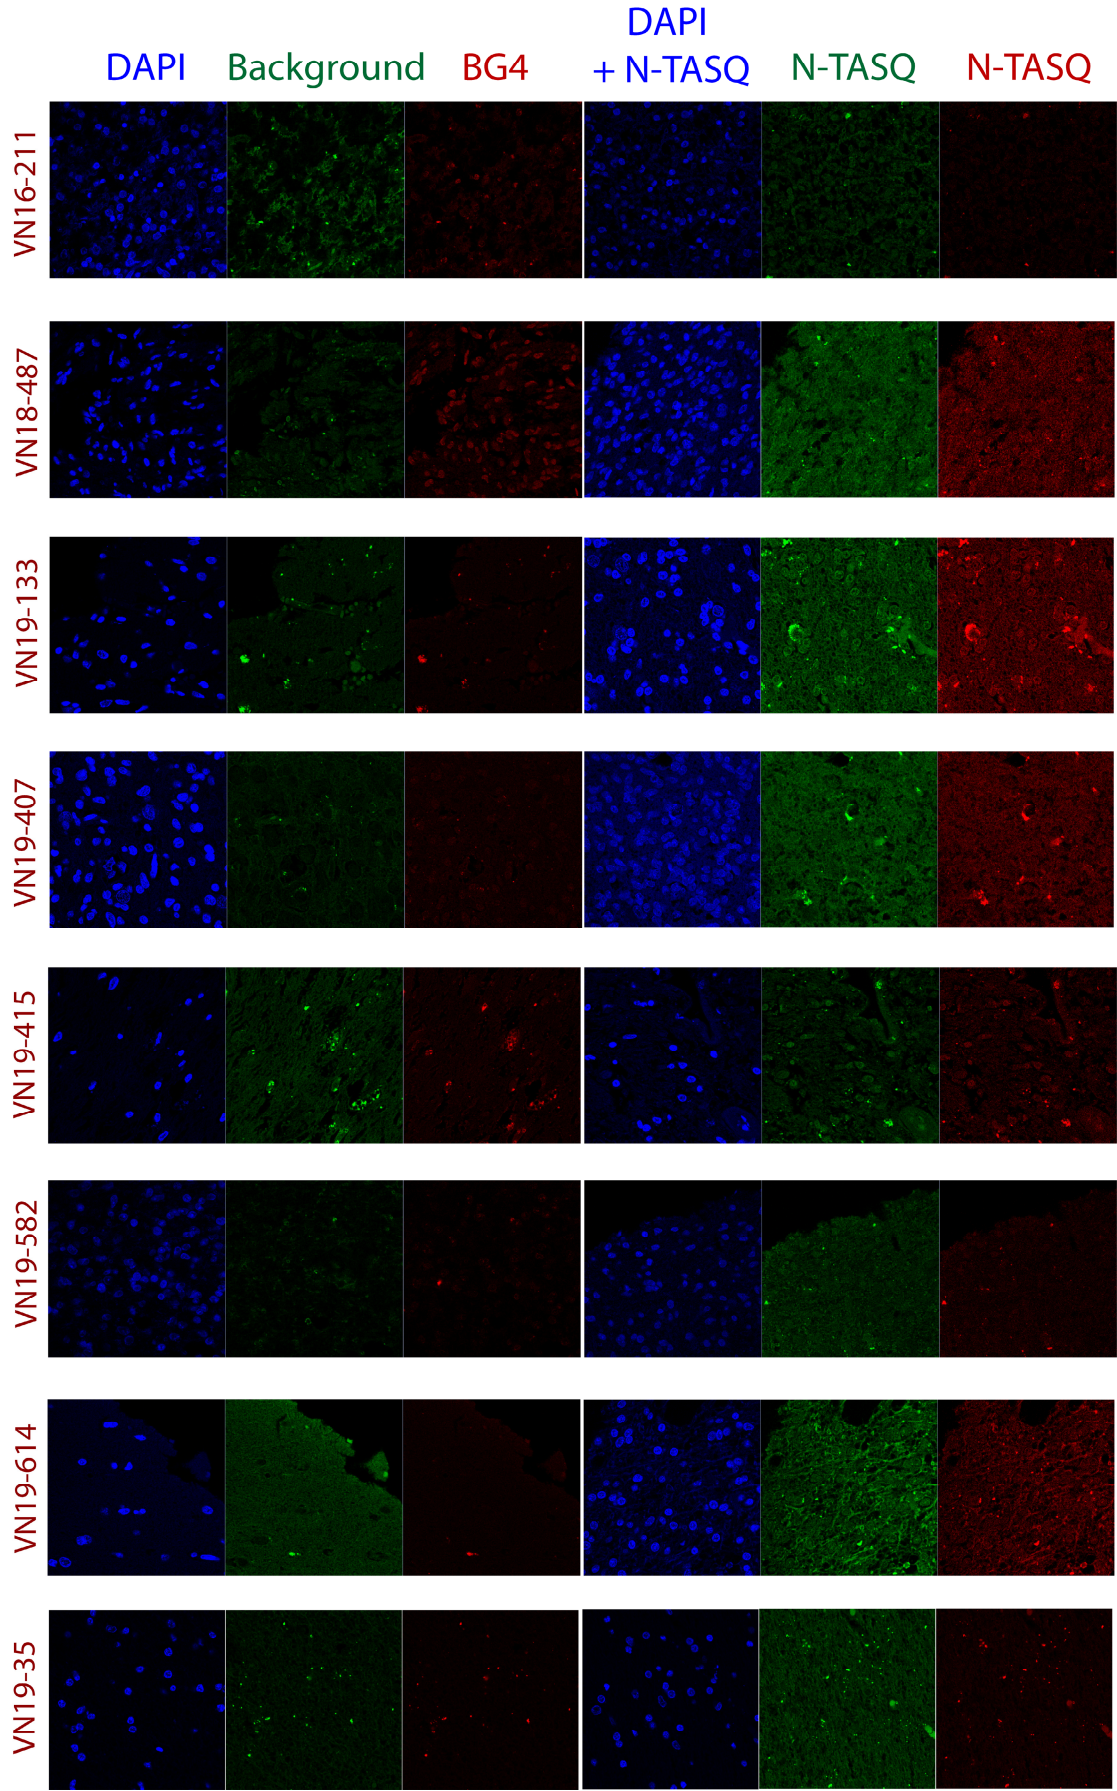

ALT+ (ATR-)

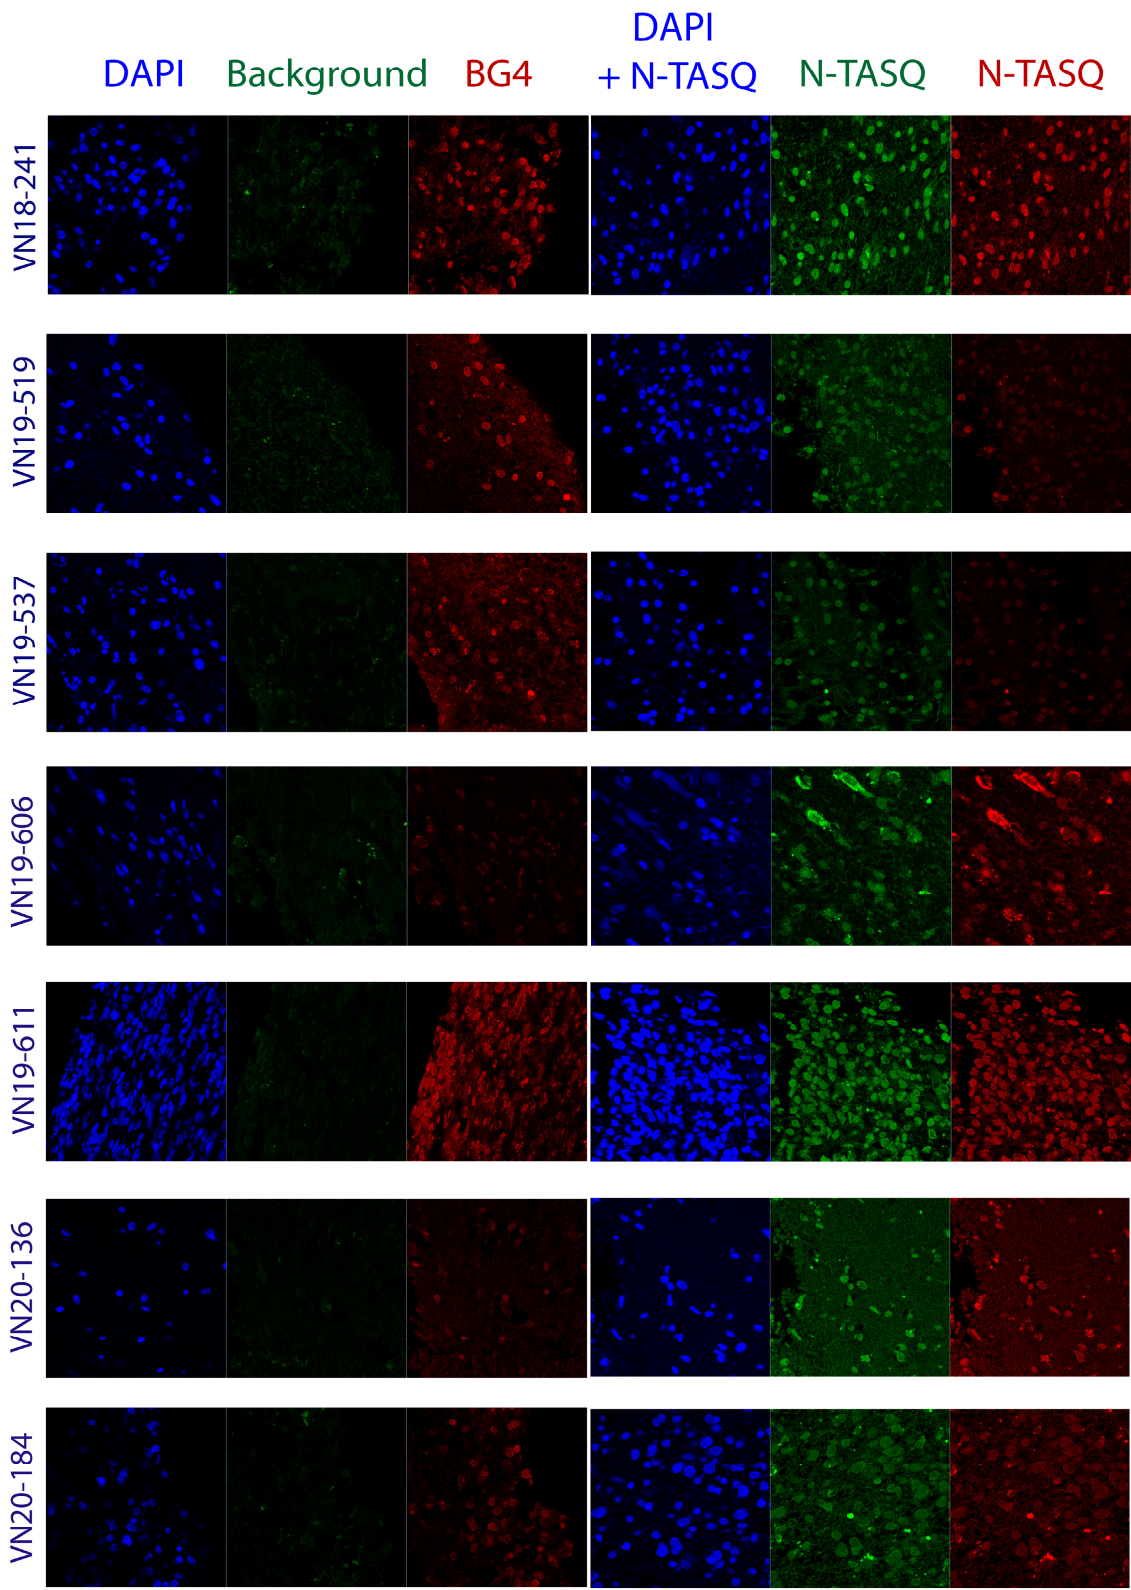

ALT+ (ATRX-)

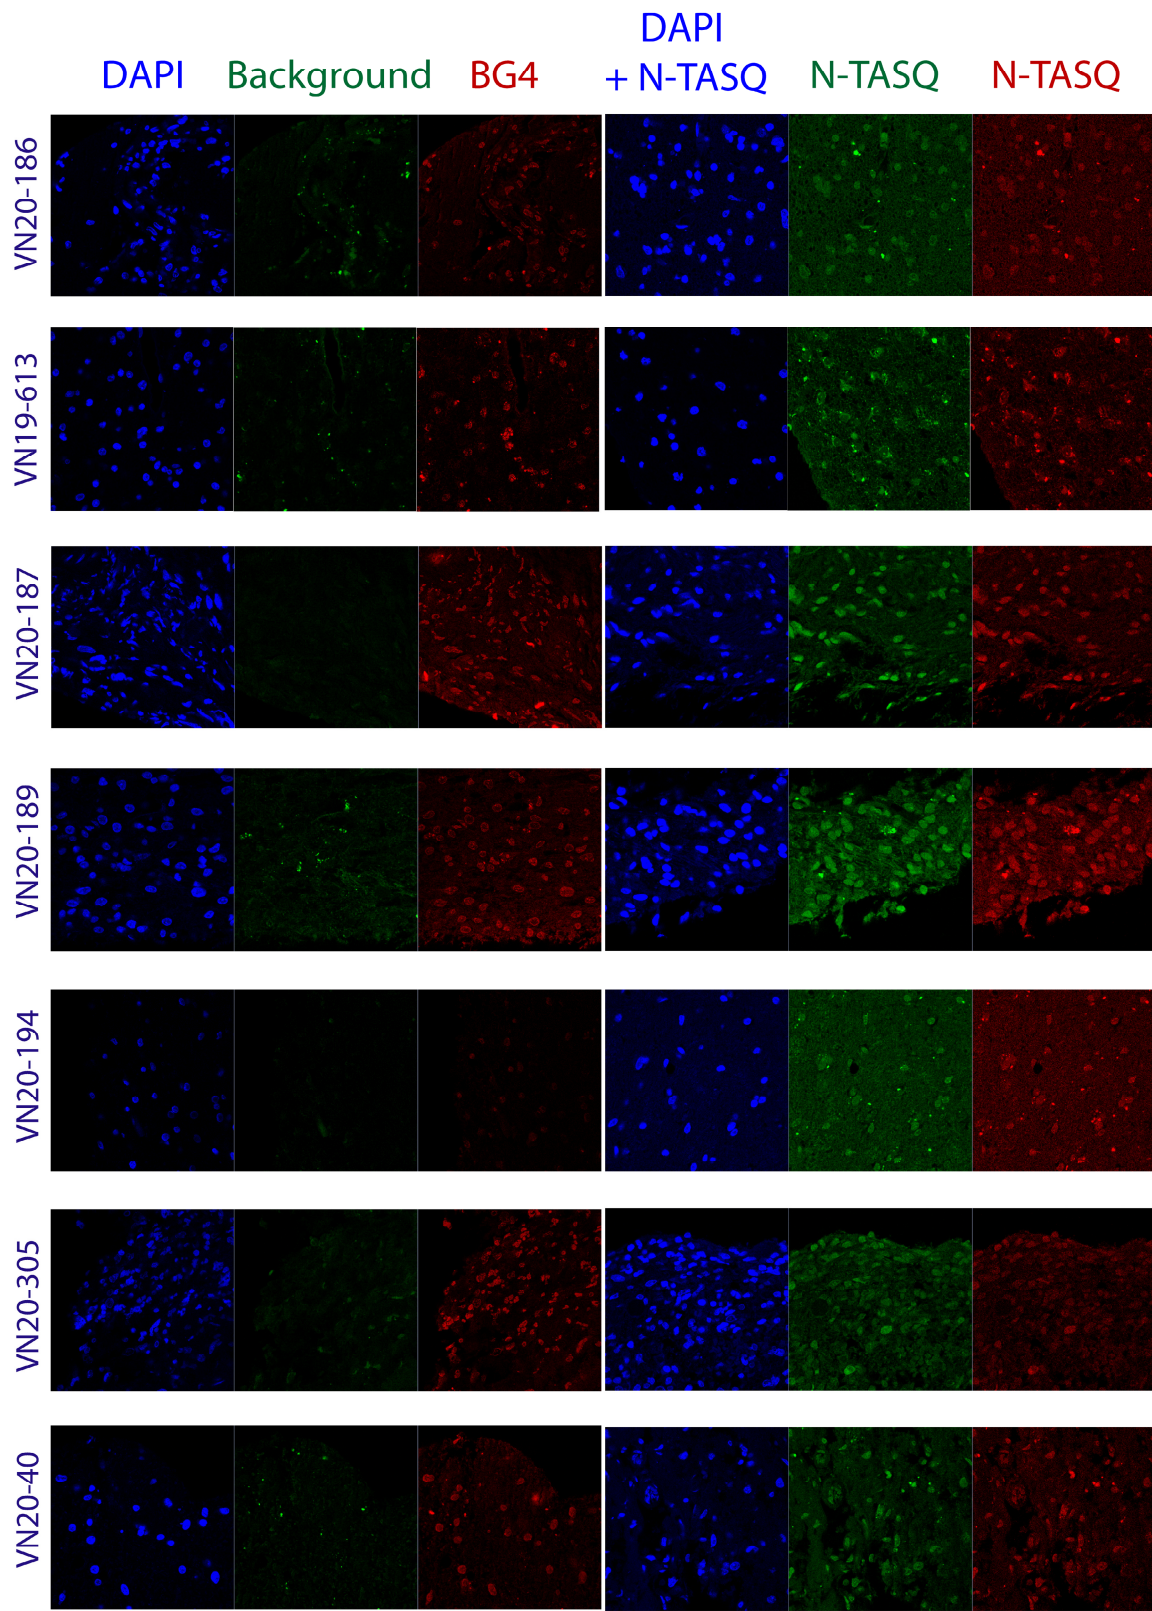

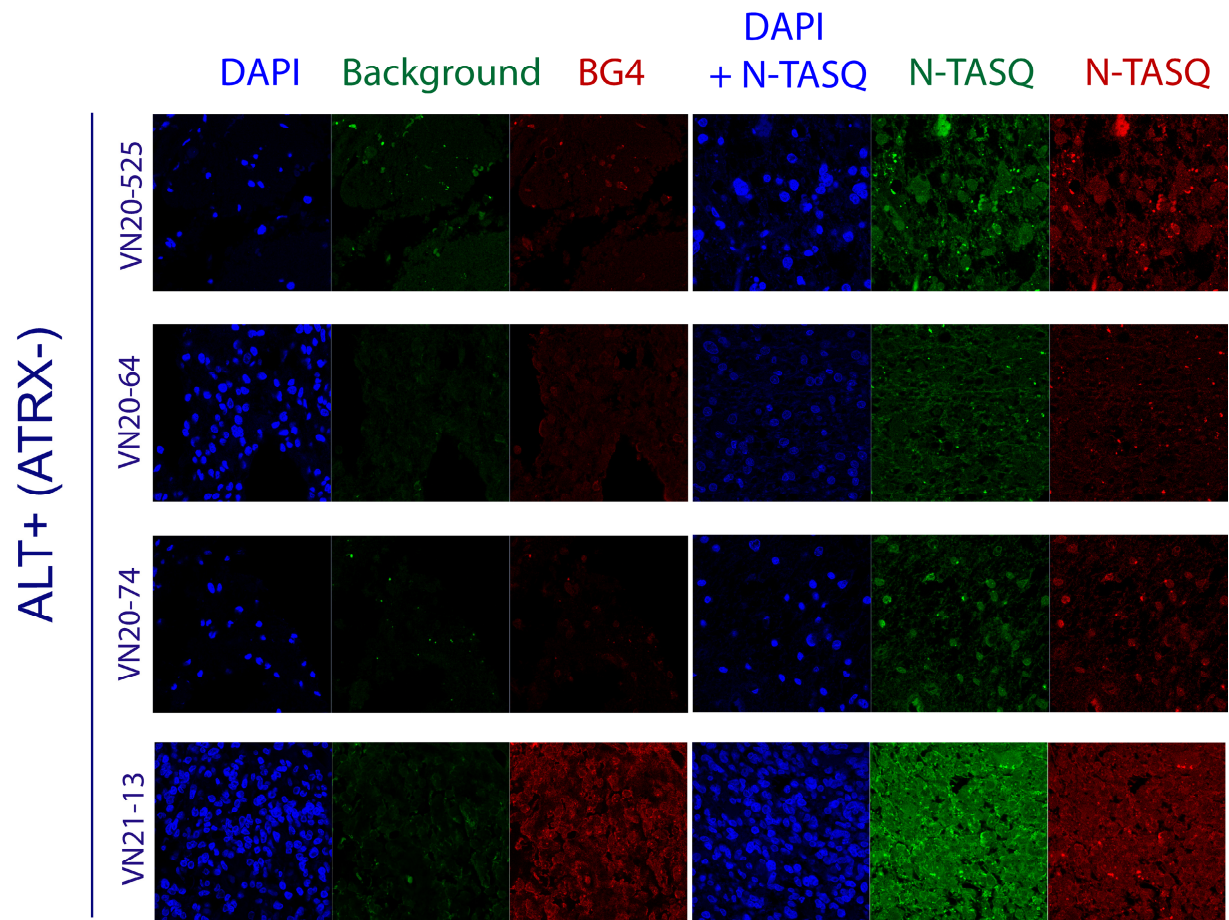

Figure 12. Examples of raw images of BG4 and N-TASQ IHC staining in low-grade glioma tissue. Blue patient IDs indicates ATRX- status while red patient IDs indicates ATRX+ status.

---Other Tables---

| <b>Table 1. Specifications of cell lines used</b> |                              |                   |                  |                                           |                                          |
|---------------------------------------------------|------------------------------|-------------------|------------------|-------------------------------------------|------------------------------------------|
| <b>Cell line name</b>                             | <b>Source or Vendor</b>      | <b>Tissue</b>     | <b>Cell type</b> | <b>Disease/ Transformation method</b>     | <b>Telomere maintenance status [ref]</b> |
| GM847 (GM00847)                                   | Coriell Institute            | Skin              | Fibroblast       | SV40-transformed                          | ALT+ [3]                                 |
| SKLU1 (SK-LU-1)                                   | ATCC HTB-57                  | Lung              | Epithelial       | Adenocarcinoma                            | ALT+ [4]                                 |
| U2OS (U-2 OS)                                     | ATCC HTB-96                  | Bone              | Epithelial       | Osteosarcoma                              | ALT+ [4,5]                               |
| SAOS-2                                            | ATCC HTB-85                  | Bone              | Epithelial       | Osteosarcoma                              | ALT+ [4,5]                               |
| HELA (HeLa)                                       | ATCC CCL-2                   | Cervix            | Epithelial       | Adenocarcinoma                            | TERT+ [3,4]                              |
| MCF7 (MCF-7)                                      | ATCC HTB-22                  | Breast            | Epithelial       | Adenocarcinoma                            | TERT+ [6]                                |
| HT1080 (HT-1080)                                  | ATCC CCL-121                 | Connective tissue | Epithelial       | Fibrosarcoma                              | TERT+ [7]                                |
| SUSM1 (SUSM-1)                                    | Gift from Kathy Collins' Lab | Liver             | Fibroblast       | Gammy ray- and 4NQO-transformed           | ALT+ [3]                                 |
| HELA 1.3                                          | Gift from Kathy Collins' Lab | Cervix            | epithelial       | HELA subclone with longer telomere length | TERT+ [8]                                |

| <b>Table 2. Specifications of antibodies used in ICC, CHIP and PLA</b> |                                                                     |                                     |                           |                                  |
|------------------------------------------------------------------------|---------------------------------------------------------------------|-------------------------------------|---------------------------|----------------------------------|
| <b>Antibody Name</b>                                                   | <b>Vendor (Catalog #)</b>                                           | <b>Type</b>                         | <b>Target of antibody</b> | <b>Application in this study</b> |
| BG4                                                                    | Homemade (purified from BL21 DE3 expressing pSANG10-3F-BG4 plasmid) | Single-chain fragment with FLAG tag | G-quadruplex              | ICC, ChIP, ChIP-ReChIP, PLA      |
| Anti-FLAG M2                                                           | Sigma (F3165)                                                       | Mouse monoclonal primary antibody   | FLAG tag                  | ICC                              |
| Anti-FLAG M2                                                           | Sigma (F1804)                                                       | Mouse monoclonal primary antibody   | FLAG tag                  | PLA                              |
| DYKDDDK Tag Rabbit mAB                                                 | Cell Signaling (14793)                                              | Rabbit monoclonal primary antibody  | FLAG tag                  | ICC                              |
| Anti-DNA-RNA Hybrid, clone S9.6                                        | Millipore (MABE1095)                                                | Mouse monoclonal primary antibody   | DNA/RNA- hybrid (R-loop)  | ICC, ChIP, ChIP-ReChIP           |
| Anti-S9.6 antibody                                                     | Absolute Antibody (Ab01137-23.0)                                    | Rabbit monoclonal primary antibody  | DNA/RNA- hybrid (R-loop)  | PLA                              |
| TRF2 Antibody                                                          | Novus Biologicals (NB110-57130)                                     | Rabbit polyclonal primary antibody  | TRF2                      | ICC                              |
| Anti-phospho-H2A.X, clone JBW301                                       | Millipore-Sigma (05-636)                                            | Mouse monoclonal primary antibody   | γH2AX                     | ICC, ChIP, ChIP-ReChIP           |
| PML antibody                                                           | Santa Cruz (sc-966)                                                 | Mouse monoclonal primary antibody   | PML                       | ICC                              |
| Goat anti-mouse IgG, Alexa Fluor 488                                   | Invitrogen (A11001)                                                 | Goat polyclonal secondary antibody  | Mouse IgG                 | ICC                              |
| Goat anti-mouse IgG, Alexa Fluor 594                                   | Invitrogen (A11032)                                                 | Goat polyclonal secondary antibody  | Mouse IgG                 | ICC                              |
| Goat anti-rabbit IgG, Texas Red                                        | Invitrogen (T2767)                                                  | Goat polyclonal secondary antibody  | Rabbit IgG                | ICC                              |

## REFERENCES

- 1) Chung,C.T., Niemela,S.L. and Miller,R.H. (1989) One-step preparation of competent Escherichia coli: transformation and storage of bacterial cells in the same solution. *Proceedings of the National Academy of Sciences*, **86**, 2172–2175.
- 2) Zeng,X.-L., Thumati,N.R., Fleisig,H.B., Hukezalie,K.R., Savage,S.A., Giri,N., Alter,B.P. and Wong,J.M.Y. (2011) The accumulation and not the specific activity of telomerase ribonucleoprotein determines telomere maintenance deficiency in X-linked dyskeratosis congenita. *Human Molecular Genetics*, **21**, 721–729.
- 3) TM;Englezou,B. (2021) Telomere elongation in immortal human cells without detectable telomerase activity. *The EMBO journal*, **14**.
- 4) Bryan,T.M., Englezou,A., Dalla-Pozza,L., Dunham,M.A. and Reddel,R.R. (1997) Evidence for an alternative mechanism for maintaining telomere length in human tumors and tumor-derived cell lines. *Nature Medicine*, **3**, 1271–1274.
- 5) Scheel,C., Schaefer,K.-L., Jauch,A., Keller,M., Wai,D., Brinkschmidt,C., van Valen,F., Boecker,W., Dockhorn-Dworniczak,B. and Poremba,C. (2001) Alternative lengthening of telomeres is associated with chromosomal instability in osteosarcomas. *Oncogene*, **20**, 3835–3844.
- 6) Kyo S;Takakura M;Kanaya T;Zhuo W;Fujimoto K;Nishio Y;Orimo A;Inoue M (2021) Estrogen activates telomerase. *Cancer research*, **59**.
- 7) Holt,S.E., Aisner,D.L., Shay,J.W. and Wright,W.E. (1997) Lack of cell cycle regulation of telomerase activity in human cells. *Proceedings of the National Academy of Sciences*, **94**, 10687–10692.
- 8) Takai,K.K., Hooper,S., Blackwood,S., Gandhi,R. and de Lange,T. (2010) In Vivo Stoichiometry of Shelterin Components\*. *Journal of Biological Chemistry*, **285**, 1457–1467.
